# Supplementary material for: Evaluation of copy number variation and gene expression in neurofibromatosis type-1-associated malignant peripheral nerve sheath tumours
Source: PubMed Central journal article supplement (PMC4367978; doi:10.1186/s40246-015-0025-3), 2015-02-15
Supplement: 40246_2015_25_MOESM1_ESM.pdf [file 40246_2015_25_MOESM1_ESM.pdf]

| <b>Additional file 1: Table S2: The 4 distinct sets of genes identified from the various analyses of differentially expressed genes that were performed</b> |                             |                                 |                            |
|-------------------------------------------------------------------------------------------------------------------------------------------------------------|-----------------------------|---------------------------------|----------------------------|
|                                                                                                                                                             | <b>Full Normalised List</b> | <b>Less Stringent Gene List</b> | <b>Stringent Gene List</b> |
| 4 benign vs. 5 malignant                                                                                                                                    | 17881                       | 1957                            | 258                        |
| 3 benign vs. 3 malignant                                                                                                                                    | 17881                       | 1259                            | 127                        |
| Cross-comparison (common lists)                                                                                                                             | NA                          | 649                             | 49                         |
