# Supplementary material for: Evaluation of copy number variation and gene expression in neurofibromatosis type-1-associated malignant peripheral nerve sheath tumours
Source: PubMed Central journal article supplement (PMC4367978; doi:10.1186/s40246-015-0025-3), 2015-02-15
Supplement: 40246_2015_25_MOESM2_ESM.pdf [file 40246_2015_25_MOESM2_ESM.pdf]

|        |           |               |              |                                 |         |       |        |        |        |                           |   |               |
|--------|-----------|---------------|--------------|---------------------------------|---------|-------|--------|--------|--------|---------------------------|---|---------------|
| 11190  | NM_007190 | SEC23AP       | segmentation | Expression up, copy number down | 3267456 | 1.77  | 0.0032 | 1.83   | 0.0292 | M15T M3T M5T M7T M8T      | 5 | Deletion      |
| 11330  | NM_007272 | CTRC          | segmentation | Both down                       | 2321797 | -1.74 | 0.0075 | -1.43  | 0.0211 | M15T M2T M5T M7T M8T      | 5 | Deletion      |
| 23530  | NM_012243 | HW17          | segmentation | Both up                         | 2508436 | 2.17  | 0.0273 | 2.22   | 0.0151 | M14T M15T M2T M3T M8T     | 5 | Amplification |
| 23630  | NM_012472 | LRRRC6        | segmentation | Expression down, copy number up | 3154136 | -3.74 | 0.0022 | -2.36  | 0.0151 | M15T M3T M7T M8T M8T      | 5 | Amplification |
| 10113  | NM_013388 | PREB          | segmentation | Both up                         | 2545509 | 1.43  | 0.0278 | 1.45   | 0.0249 | M14T M2T M3T M7T M8T      | 5 | Amplification |
| 27040  | NM_014390 | SNB1          | segmentation | Both up                         | 3022466 | 1.77  | 0.0084 | 1.71   | 0.0334 | M15T M2T M3T M5T M7T      | 5 | Amplification |
| 89113  | NM_014860 | SUP7L7        | segmentation | Both up                         | 2546006 | 1.84  | 0.0113 | 1.79   | 0.0271 | M14T M2T M3T M7T M8T      | 5 | Amplification |
| 22870  | NM_014937 | INPP5F        | segmentation | Both down                       | 3287382 | -4.57 | 0.0003 | -4.40  | 0.0085 | M15T M3T M5T M7T M8T      | 5 | Deletion      |
| 22970  | NM_014971 | EPFR3B        | segmentation | Expression down, copy number up | 2473716 | -1.47 | 0.0084 | -1.42  | 0.0492 | M14T M2T M3T M7T M8T      | 5 | Amplification |
| 23362  | NM_015338 | AHKY12        | segmentation | Expression down, copy number up | 3023394 | -1.93 | 0.0071 | -2.26  | 0.0231 | M15T M2T M3T M5T M7T      | 5 | Amplification |
| 51631  | NM_016019 | LUC7L2        | segmentation | Expression down, copy number up | 3026988 | -1.34 | 0.0441 | -1.49  | 0.0014 | M15T M2T M3T M5T M7T      | 5 | Amplification |
| 57440  | NM_016252 | BRCC9         | segmentation | Both up                         | 2476219 | 1.62  | 0.0385 | 1.50   | 0.0321 | M14T M2T M3T M7T M8T      | 5 | Amplification |
| 81571  | NM_016623 | FAM448B       | segmentation | Both up                         | 3153326 | 1.81  | 0.0375 | 2.21   | 0.0468 | M15T M3T M7T M8T M8T      | 5 | Amplification |
| 55654  | NM_017849 | TMEM127       | segmentation | Both up                         | 2565246 | 2.34  | 0.0052 | 1.73   | 0.0404 | M14T M15T M2T M3T M7T M8T | 6 | Amplification |
| 54970  | NM_017888 | ITIC12        | segmentation | Both down                       | 3349453 | -1.97 | 0.0161 | -1.43  | 0.0207 | M15T M2T M3T M7T M8T      | 5 | Deletion      |
| 55668  | NM_017921 | NPLCC4        | segmentation | Both up                         | 3174026 | 1.90  | 0.0173 | 1.79   | 0.0194 | M15T M2T M3T M5T M8T      | 5 | Amplification |
| 55676  | NM_017964 | SLC30A6       | segmentation | Both up                         | 2476116 | 2.26  | 0.0001 | 2.23   | 0.0019 | M14T M2T M3T M7T M8T      | 5 | Amplification |
| 50807  | NM_018482 | DOEF1         | segmentation | Both up                         | 3153428 | 1.80  | 0.0143 | 2.04   | 0.0075 | M15T M2T M3T M7T M8T      | 5 | Amplification |
| 8441   | NM_018685 | ANKL          | segmentation | Both up                         | 2587176 | 4.85  | 0.0311 | 7.53   | 0.0466 | M15T M2T M3T M5T M8T M8T  | 6 | Amplification |
| 55624  | NM_019059 | C1orf83       | segmentation | Both down                       | 2428079 | -1.86 | 0.0143 | -1.41  | 0.0416 | M2T M3T M5T M7T M8T       | 5 | Deletion      |
| 83310  | NM_021196 | SLC4A5        | segmentation | Expression down, copy number up | 2558946 | -1.64 | 0.0026 | -1.54  | 0.0361 | M14T M15T M2T M3T M7T M8T | 6 | Amplification |
| 64224  | NM_022373 | HERPUD2       | segmentation | Both up                         | 3045739 | 1.31  | 0.0044 | 1.36   | 0.0226 | M15T M2T M3T M5T M8T M8T  | 6 | Amplification |
| 64418  | NM_022484 | TMEM168       | segmentation | Both up                         | 3068476 | 1.65  | 0.0055 | 1.72   | 0.0465 | M15T M3T M5T M7T M8T      | 5 | Amplification |
| 84427  | NM_022492 | ITIC1         | segmentation | Both up                         | 2489322 | 1.39  | 0.0114 | 1.45   | 0.0134 | M14T M15T M2T M3T M7T M8T | 6 | Amplification |
| 64762  | NM_022751 | FAM58A        | segmentation | Both down                       | 3803290 | -2.81 | 0.0043 | -3.35  | 0.0262 | M15T M2T M3T M7T M8T      | 5 | Deletion      |
| 64869  | NM_022894 | PAPOLG        | segmentation | Both up                         | 2484305 | 1.76  | 0.0026 | 2.05   | 0.0041 | M14T M15T M2T M3T M7T M8T | 6 | Amplification |
| 80059  | NM_024093 | RPTM4         | segmentation | Expression down, copy number up | 2505881 | -7.50 | 0.0009 | -11.89 | 0.0045 | M14T M15T M2T M3T M7T M8T | 6 | Amplification |
| 259217 | NM_025015 | HSPA12A       | segmentation | Both down                       | 3306397 | -4.93 | 0.0062 | -5.92  | 0.0053 | M15T M3T M5T M7T M8T      | 5 | Deletion      |
| 80217  | NM_025145 | C10orf79      | segmentation | Both down                       | 3305198 | -1.96 | 0.0009 | -1.92  | 0.0238 | M15T M3T M5T M7T M8T      | 5 | Deletion      |
| 80763  | NM_025244 | TSG10         | segmentation | Expression down, copy number up | 2566586 | -1.14 | 0.0068 | -1.87  | 0.0209 | M14T M2T M3T M7T M8T      | 5 | Amplification |
| 81553  | NM_030797 | FAM49A        | segmentation | Both up                         | 2541699 | 3.22  | 0.0056 | 3.19   | 0.0455 | M14T M2T M3T M7T M8T      | 5 | Amplification |
| 83530  | NM_031422 | CHST9         | segmentation | Both down                       | 3802416 | -3.30 | 0.0106 | -2.77  | 0.0091 | M15T M2T M3T M5T M7T M8T  | 5 | Deletion      |
| 83660  | NM_032044 | REC4          | segmentation | Both down                       | 2431066 | -1.36 | 0.0003 | -1.36  | 0.0067 | M2T M3T M5T M7T M8T       | 5 | Deletion      |
| 84912  | NM_032826 | SLC35B4       | segmentation | Both up                         | 3074039 | 1.97  | 0.0123 | 1.80   | 0.0351 | M15T M2T M3T M5T M7T      | 5 | Amplification |
| 84920  | NM_032842 | TMEM209       | segmentation | Both up                         | 3072435 | 1.33  | 0.0342 | 1.49   | 0.0326 | M15T M2T M3T M5T M7T      | 5 | Amplification |
| 90827  | NM_033273 | ZNF479        | segmentation | Expression down, copy number up | 3304009 | -1.48 | 0.0028 | -1.40  | 0.0483 | M15T M2T M3T M5T M8T M8T  | 6 | Amplification |
| 118663 | NM_144587 | BTBD16        | segmentation | Both down                       | 3268222 | -1.55 | 0.0069 | -1.31  | 0.0065 | M15T M3T M5T M7T M8T      | 5 | Deletion      |
| 220130 | NM_145020 | CCDC11        | segmentation | Both down                       | 3807732 | -1.61 | 0.0015 | -1.66  | 0.0038 | M15T M2T M3T M7T M8T      | 5 | Deletion      |
| 143870 | NM_152423 | HSTB20        | segmentation | Both down                       | 3389546 | -1.94 | 0.0219 | -1.54  | 0.0209 | M15T M2T M3T M7T M8T      | 5 | Deletion      |
| 222166 | NM_152793 | C7orf41       | segmentation | Expression down, copy number up | 2996254 | -4.70 | 0.0083 | -6.03  | 0.0111 | M15T M2T M3T M5T M8T M8T  | 6 | Amplification |
| 151090 | NM_153021 | PLB1          | segmentation | Both up                         | 2479116 | 1.58  | 0.0148 | 1.61   | 0.0369 | M14T M2T M3T M7T M8T      | 5 | Amplification |
| 28100  | NM_153442 | SPR26         | segmentation | Both down                       | 3268895 | -1.51 | 0.0054 | -1.47  | 0.0452 | M15T M3T M5T M7T M8T      | 5 | Deletion      |
| 287409 | NM_172311 | STOM1-GTF2A1L | segmentation | Expression down, copy number up | 2481379 | -1.83 | 0.0327 | -2.17  | 0.0453 | M14T M15T M2T M3T M7T M8T | 6 | Amplification |
| 257184 | NM_173808 | NEGR1         | segmentation | Both down                       | 2418078 | -5.20 | 0.0006 | -6.56  | 0.0023 | M15T M2T M3T M5T M8T      | 5 | Deletion      |
| 220362 | NM_175885 | MGCC3B46      | segmentation | Both down                       | 3384346 | -1.84 | 0.0000 | -1.61  | 0.0011 | M15T M2T M3T M7T M8T      | 5 | Deletion      |
| 550    | NM_181575 | ALP1          | segmentation | Both up                         | 2560254 | 2.09  | 0.0087 | 1.82   | 0.0030 | M14T M15T M2T M3T M7T M8T | 6 | Amplification |
| 157370 | NM_194291 | TMEM65        | segmentation | Both up                         | 3151883 | 1.69  | 0.0103 | 2.08   | 0.0071 | M15T M3T M7T M8T M8T      | 5 | Amplification |
| 200720 | NM_196216 | TMEM17        | segmentation | Expression down, copy number up | 2558530 | -1.86 | 0.0077 | -2.09  | 0.0223 | M14T M15T M2T M3T M7T M8T | 6 | Amplification |
| 340700 | NM_198496 | VWAZ          | segmentation | Both down                       | 3265224 | -1.61 | 0.0003 | -1.57  | 0.0054 | M15T M3T M5T M7T M8T      | 5 | Deletion      |
| 374300 | NM_198515 | C10orf96      | segmentation | Both down                       | 3269809 | -1.44 | 0.0081 | -1.38  | 0.0212 | M15T M2T M3T M7T M8T      | 5 | Deletion      |
| 375617 | NM_198999 | SLC26A5       | segmentation | Expression down, copy number up | 3066084 | -1.89 | 0.0010 | -1.60  | 0.0196 | M15T M2T M3T M5T M7T      | 5 | Amplification |
