# Supplementary material for: Evaluation of copy number variation and gene expression in neurofibromatosis type-1-associated malignant peripheral nerve sheath tumours
Source: PubMed Central journal article supplement (PMC4367978; doi:10.1186/s40246-015-0025-3), 2015-02-15
Supplement: 40246_2015_25_MOESM4_ESM.pdf [file 40246_2015_25_MOESM4_ESM.pdf]

**Additional file 4: Table S1: Primers used for q-PCR analysis and results of the q-PCR analysis**

| Gene ID                  | Forward Primer (5'-3')      | Reverse Primer (5'-3')   | Size (bp) |
|--------------------------|-----------------------------|--------------------------|-----------|
| <i>ADH1B</i>             | AGCCCATTCACCACTTCCT         | AGTACACGGTGGTGGATGAG     | 59        |
| <i>CCT5</i>              | CTTTGTGTGTCATCCGGAAC        | CTGCTGAGATATCCTGTGCC     | 77        |
| <i>CD72</i>              | AAACTTGGTCATGGTGGACA        | ACAGTCCTTTGCACTGAGTTG    | 114       |
| <i>COL10A1</i>           | ATGCTGCCACAAATACCCTT        | AAGGCCCACTACCCAACAC      | 113       |
| <i>CSRP1</i>             | TGCTACGGCAAGAAGTATGG        | ACCCTCAGCACTGACAAGG      | 73        |
| <i>EFHC2</i>             | TTGACTGTTGGAAACCTTGC        | ATTTCTTAATCGCACTGGCC     | 105       |
| <i>FAM177A1</i>          | TCAATTTATGGCCGAGTTTG        | TGCCACCATACAGAGTCAGAT    | 77        |
| <i>FAP</i>               | TAAATTAGCATATGTCTATCAAACAAT | TCAAATAACATTTAATGGAAGAGA | 87        |
| <i>FLJ42200/AK124194</i> | CATGAGAAACTCTTTTGAGAA       | TTTCAAAGCTTTGAATATAAAG   | 74        |
| <i>GRIK2</i>             | TTGGTGGCATCTTCATTGTT        | TTTGTGGCAGTGGGAGAAT      | 66        |
| <i>GRIK3</i>             | TGACAACAAGGACACCTTC         | CAGTACCTCAAGTGGCGGT      | 96        |
| <i>GTDC1</i>             | TTTCAGCCAGAGCAGAGAGA        | CTGCACGACAAGAATATTTGG    | 100       |
| <i>KIAA0746</i>          | TTAACCTGGCCCTGCTAATC        | TCTCCATTCTCCAGGAAGTGT    | 114       |
| <i>KRTAP13-4</i>         | CTACCCAGGCTCCTACCCC         | CGTTCCCTCTCTACAGGGA      | 90        |
| <i>NSBP1/HMGN5</i>       | GTACAGGTCGTGCTGCAGTT        | GAGAGCTACAACAATGCCCA     | 124       |
| <i>PEG3</i>              | ATCTTTCCCTTCCTGTGGTG        | ACTCCAGGGCTTATGAGTCC     | 80        |
| <i>PTGIS</i>             | GCCGGCTACCTGACTCTTTA        | GATGTCTTCCACACCTTTTCG    | 101       |
| <i>SLC25A12</i>          | TTTGGACAGACTATTATTCATCATCA  | GCATAACCGGAAGAAGCATC     | 91        |
| <i>SPP1</i>              | AGGACCTGAACGCGCCTTCT        | AGCCAATGATGAGAGCAATGAG   | 143       |
| <i>TDP1</i>              | TGGTCAGCTGAGACTTCTGG        | TGCTTGGTTCCTTGTCACA      | 102       |
